# Supplementary material for: Collaborative design of Li–S batteries using 3D N-doped graphene aerogel as a sulfur host and graphitic carbon nitride paper as an interlayer
Source: Royal Society of Chemistry journal article supplement (doi:10.1039/c7se00291b), 2017-01-01
Supplement: c7se00291b1.pdf [file c7se00291b1.pdf]

Electronic Supporting Information (ESI)

**Collaborative design of Li-S battery using 3D N-doped graphene aerogel as a sulfur host and graphitic carbon nitride paper as an interlayer**

Juthaporn Wutthiprom,<sup>a</sup> Nutthaphon Phattharasupakun,<sup>a</sup> Jakkrit Khuntilo,<sup>a</sup> Thana Maihom,<sup>a,c</sup> Jumras Limtrakul,<sup>b,c</sup> and Montree Sawangphruk<sup>\*a</sup>

<sup>a</sup> Department of Chemical and Biomolecular Engineering, School of Energy Science and Engineering, Vidyasirimedhi Institute of Science and Technology, Rayong 21210, Thailand

<sup>b</sup> Department of Materials Engineering, School of Molecular Science and Engineering, Vidyasirimedhi Institute of Science and Technology, Rayong 21210, Thailand.

<sup>c</sup> Laboratory for Computational and Applied Chemistry, Department of Chemistry, Faculty of Science and Center for Advanced Studies in Nanotechnology and Its Applications in Chemical, Food and Agricultural Industries, Kasetsart University, Bangkok 10900, Thailand

\*Corresponding author: E-mail: montree.s@vistec.ac.th; Fax: +66 (0)33-01-4445; Tel: +66 (0)33-01-4251

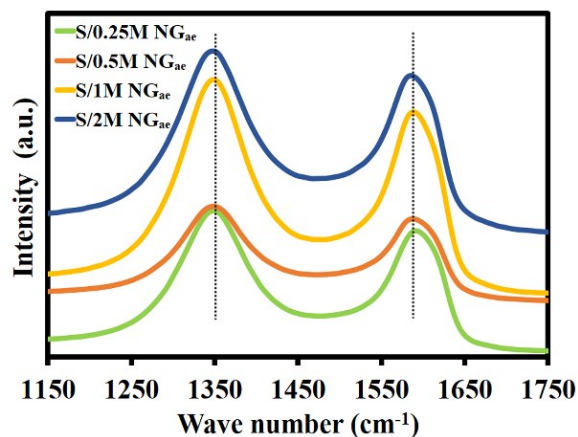

**Fig. S1.** Raman spectra of NG<sub>ae</sub> at different hydrazine concentrations.

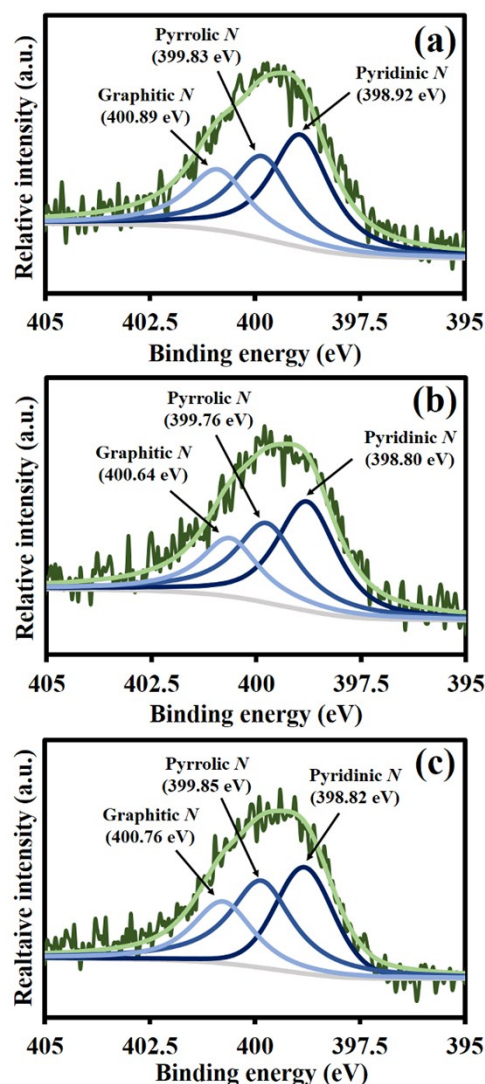

**Fig. S2.** Narrow scan N1s spectra of (a) 0.25M, (b) 0.5M, and (c) 2M NG<sub>ae</sub>.

**Fig. S3a** shows an FE-SEM image of g-C<sub>3</sub>N<sub>4</sub> which indicates a typical porous morphology of this material. In addition, a Raman spectrum (**Fig. S3b**) represents the result, which is in good agreement with other previous works<sup>1-3</sup>. An XRD pattern in **Fig. S3c** shows two diffraction peaks at 2θ of 13.1° and 27.5°, which can be referred to the crystallographic planes of (100) and (002), respectively. The characteristic peak at the 2θ of 13.1° belongs to the interlayer graphitic stacking. Whilst, a peak at 27.5° exhibits the in-planar tri-s-triazine units of as-prepared g-C<sub>3</sub>N<sub>4</sub><sup>4, 5</sup>. In addition, an FTIR spectrum (**Fig. S3d**) reveals a sharp peak at 809 cm<sup>-1</sup> indicating the C-N stretching vibration of triazine cycles. Other peaks from 1240 to 1650 cm<sup>-1</sup> can be assigned to C-N heterocycles. The peaks at 1241 and 1315 cm<sup>-1</sup> correspond to N-C<sub>3</sub> (full condensation) and C-N-C (partial condensation), respectively. Whilst, the peaks at 1409, 1564, and 1640 cm<sup>-1</sup> represent the heptazine-derive repeating units. In addition, the peak at 888 cm<sup>-1</sup> and the broad peaks between 3000-3500 cm<sup>-1</sup> can be assigned to the N-H stretching vibration from the partial condensation of amino groups<sup>6-8</sup>. All of these peaks show the typical characteristics of g-C<sub>3</sub>N<sub>4</sub>.

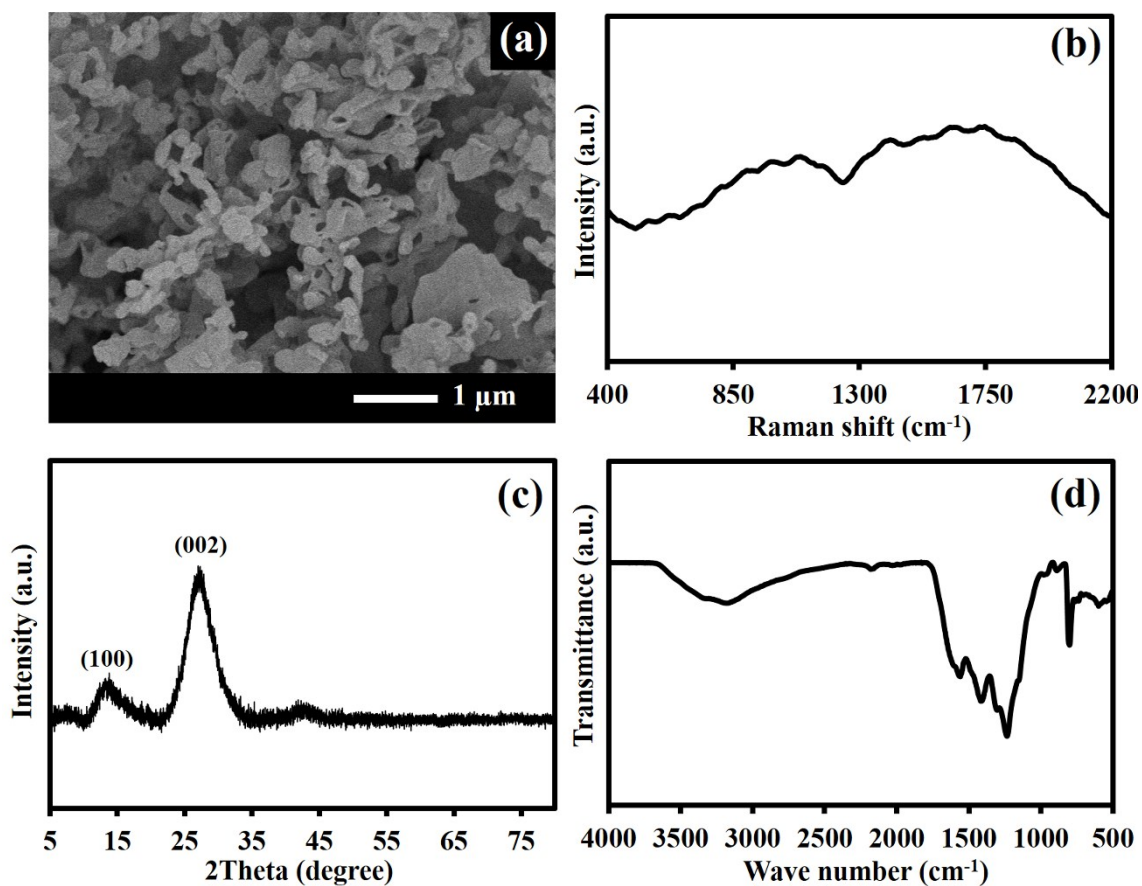

**Fig. S3.** (a) FE-SEM image, (b) Raman spectrum, (c) XRD pattern, and (d) FTIR spectrum of g-C<sub>3</sub>N<sub>4</sub>.

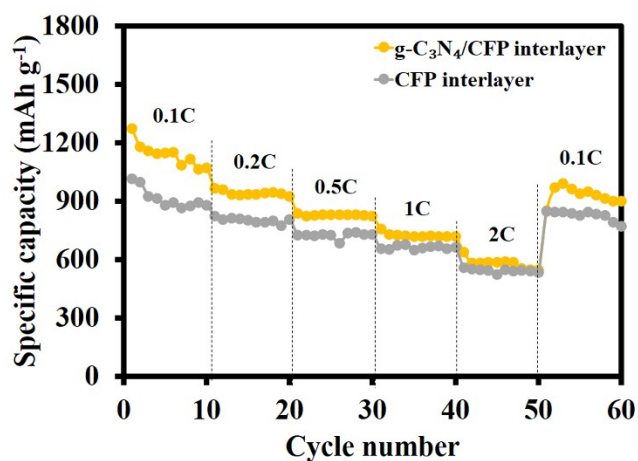

**Fig. S4.** Specific capacity of LSBs at different applied current densities (0.1C-2C) with CFP and g-C<sub>3</sub>N<sub>4</sub>/CFP interlayers.

## References

1. F. Dong, Z. Zhao, T. Xiong, Z. Ni, W. Zhang, Y. Sun and W.-K. Ho, *ACS Appl. Mater. Interfaces*, 2013, **5**, 11392-11401.
2. W.-B. Luo, S.-L. Chou, J.-Z. Wang, Y.-C. Zhai and H.-K. Liu, *Small*, 2015, **11**, 2817-2824.
3. Q. Liu and J. Zhang, *Langmuir*, 2013, **29**, 3821-3828.
4. Q. Liu, Y. Guo, Z. Chen, Z. Zhang and X. Fang, *Appl. Catal. B*, 2016, **183**, 231-241.
5. Q. Su, J. Sun, J. Wang, Z. Yang, W. Cheng and S. Zhang, *Catal. Sci. Tech.*, 2014, **4**, 1556-1562.
6. Z. Li, Y. Wu and G. Lu, *Appl. Catal. B*, 2016, **188**, 56-64.
7. J. Liu, T. Zhang, Z. Wang, G. Dawson and W. Chen, *J. Mater. Chem.*, 2011, **21**, 14398-14401.
8. W.-J. Ong, L.-L. Tan, S.-P. Chai and S.-T. Yong, *Dalton Trans.*, 2015, **44**, 1249-1257.
